# Supplementary material
Source: publisher site journal article supplement (https://www.dovepress.com/article/266130)
Supplement: Supplementary file 1 [file get_supplementary_file.php]

**Table S1.** The results of RNA sequencing and clean reads mapping to database for each group.

| Sample | Total reads before | Total base before | Total reads after | Total base after | Reads filter% | Base filter% | GC% before | GC%-After |
| --- | --- | --- | --- | --- | --- | --- | --- | --- |
| N514 | 23151946 | 3472722773 | 21302635 | 503672048 | 0.92012287 | 0.145036642 | 49 | 47 |
| T514 | 21362687 | 3204349474 | 16946054 | 447650487 | 0.7932548 | 0.139700894 | 50 | 50 |
| N519 | 22123980 | 3318540959 | 18653837 | 434022128 | 0.843150147 | 0.130787034 | 50 | 48 |
| T519 | 20162583 | 3024332457 | 17849860 | 430658833 | 0.885296294 | 0.14239798 | 49 | 48 |
| N521 | 21144585 | 3171636538 | 19500668 | 429776353 | 0.922253523 | 0.13550618 | 49 | 48 |
| T521 | 21346780 | 3201959628 | 18782297 | 467612527 | 0.879865582 | 0.146039482 | 49 | 50 |
| N561 | 21771621 | 3265684943 | 20613103 | 504865678 | 0.946787701 | 0.154597178 | 49 | 49 |
| T561 | 19960765 | 2994064964 | 17064328 | 409479604 | 0.854893487 | 0.136763767 | 49 | 49 |
| N586 | 18372912 | 2755869814 | 14154494 | 362088405 | 0.770400141 | 0.131388066 | 50 | 51 |
| T586 | 20095869 | 3014320626 | 18519277 | 403404649 | 0.921546463 | 0.133829376 | 48 | 47 |

**Table S2.** The results of miRNA sequencing and clean reads mapping to miRNA database for each group.

| Sample | Mapped | Mapped rate | Unique mapped | Unique mapped rate | Repeat mapped | All base | Unmapped base | Mapped base | Unique mapped base | Repeat mapped base | Insert size |
| --- | --- | --- | --- | --- | --- | --- | --- | --- | --- | --- | --- |
| N514 | 14948233 | 70.20% | 12478336 | 58.60% | 2469897 | 503675520 | 193207498 | 310468022 | 259424224 | 51043798 | 54 |
| T514 | 6769856 | 39.90% | 5787910 | 34.20% | 981946 | 447653500 | 306997519 | 140655981 | 120561429 | 20094552 | 52 |
| N519 | 10876972 | 58.30% | 9325208 | 50.00% | 1551764 | 434024455 | 208636947 | 225387508 | 193580384 | 31807124 | 56 |
| T519 | 11103426 | 62.20% | 9347717 | 52.40% | 1755709 | 430661538 | 200016620 | 230644918 | 194456693 | 36188225 | 54 |
| N521 | 15868666 | 81.40% | 14592486 | 74.80% | 1276180 | 429778316 | 102820945 | 326957371 | 300739519 | 26217852 | 70 |
| T521 | 8294094 | 44.20% | 6835637 | 36.40% | 1458457 | 467615903 | 293354994 | 174260909 | 144532840 | 29728069 | 43 |
| N561 | 11723015 | 56.90% | 10221282 | 49.60% | 1501733 | 504868695 | 261691461 | 243177234 | 212411479 | 30765755 | 57 |
| T561 | 8814379 | 51.70% | 7414973 | 43.50% | 1399406 | 409481946 | 226771959 | 182709987 | 154132877 | 28577110 | 50 |
| N586 | 6447500 | 45.60% | 5566162 | 39.30% | 881338 | 362092068 | 228155625 | 133936443 | 115674490 | 18261953 | 57 |
| T586 | 14688752 | 79.30% | 13449319 | 72.60% | 1239433 | 403406912 | 103511157 | 299895755 | 274305866 | 25589889 | 69 |

**Table S3.** The results of potential piRNA sequencing and clean reads mapping to piRNA database for each group.

| Sample | Mapped | Mapped rate | Unique mapped | Unique mapped rate | Repeat mapped | All base | Unmapped base | Mapped base | Unique mapped base | Repeat mapped base |
| --- | --- | --- | --- | --- | --- | --- | --- | --- | --- | --- |
| N514 | 51063 | 4.20% | 36741 | 3.00% | 14322 | 34878549 | 33342852 | 1535697 | 1103308 | 432389 |
| T514 | 79230 | 5.40% | 50720 | 3.40% | 28510 | 42873095 | 40421449 | 2451646 | 1562438 | 889208 |
| N519 | 60995 | 2.70% | 34406 | 1.50% | 26589 | 63918965 | 62201978 | 1716987 | 980350 | 736637 |
| T519 | 47834 | 3.30% | 31297 | 2.20% | 16537 | 41228192 | 39856263 | 1371929 | 902451 | 469478 |
| N521 | 30924 | 4.00% | 19645 | 2.50% | 11279 | 22344415 | 21446045 | 898370 | 572840 | 325530 |
| T521 | 118054 | 5.40% | 85225 | 3.90% | 32829 | 62906070 | 59501688 | 3404382 | 2457729 | 946653 |
| N561 | 46563 | 3.00% | 28582 | 1.90% | 17981 | 43938107 | 42560900 | 1377207 | 850325 | 526882 |
| T561 | 72779 | 3.80% | 43729 | 2.30% | 29050 | 54115868 | 52052069 | 2063799 | 1244784 | 819015 |
| N586 | 60110 | 3.40% | 34460 | 1.90% | 25650 | 50637543 | 48939653 | 1697890 | 986748 | 711142 |
| T586 | 25514 | 3.00% | 13841 | 1.60% | 11673 | 24352176 | 23625259 | 726917 | 398194 | 328723 |

**Table S4.** The results of known piRNA sequencing and clean reads mapping to piRNA database for each group.

| Sample | Mapped | Mapped rate | Unique mapped | Unique mapped rate | Repeat mapped | All base | Unmapped base | Mapped base | Unique mapped base | Repeat mapped base | Insert size |
| --- | --- | --- | --- | --- | --- | --- | --- | --- | --- | --- | --- |
| N514 | 1207 | 2.40% | 709 | 1.40% | 498 | 1535697 | 1501977 | 33720 | 20126 | 13594 | 29 |
| T514 | 2193 | 2.80% | 1173 | 1.50% | 1020 | 2451646 | 2389212 | 62434 | 33017 | 29417 | 29 |
| N519 | 1360 | 2.20% | 752 | 1.20% | 608 | 1716987 | 1679405 | 37582 | 21037 | 16545 | 28 |
| T519 | 1636 | 3.40% | 1006 | 2.10% | 630 | 1371929 | 1326151 | 45778 | 28231 | 17547 | 29 |
| N521 | 638 | 2.10% | 430 | 1.40% | 208 | 898370 | 880890 | 17480 | 11921 | 5559 | 28 |
| T521 | 9144 | 7.70% | 1823 | 1.50% | 7321 | 3404382 | 3156629 | 247753 | 52298 | 195455 | 27 |
| N561 | 1016 | 2.20% | 570 | 1.20% | 446 | 1377207 | 1348756 | 28451 | 15921 | 12530 | 28 |
| T561 | 1965 | 2.70% | 1085 | 1.50% | 880 | 2063799 | 2009303 | 54496 | 30479 | 24017 | 28 |
| N586 | 1234 | 2.10% | 893 | 1.50% | 341 | 1697890 | 1663791 | 34099 | 24680 | 9419 | 29 |
| T586 | 807 | 3.20% | 453 | 1.80% | 354 | 726917 | 704266 | 22651 | 12947 | 9704 | 28 |

**Table S5.** The results of tsRNA sequencing and clean reads mapping to tsRNA database for each group.

| Sample | Mapped | Mapped rate | Unique mapped | Unique mapped rate | Repeat mapped | All base | Unmapped base | Mapped base | Unique mapped base | Repeat mapped base | Insert size |
| --- | --- | --- | --- | --- | --- | --- | --- | --- | --- | --- | --- |
| N514 | 2161058 | 76.70% | 7467 | 0.30% | 2153591 | 87104001 | 20108802 | 66995199 | 148978 | 66846221 | 31 |
| T514 | 4588343 | 77.00% | 4170 | 0.10% | 4584173 | 185611753 | 42337565 | 143274188 | 120579 | 143153609 | 31 |
| N519 | 961147 | 78.00% | 3185 | 0.30% | 957962 | 36209063 | 8011237 | 28197826 | 80631 | 28117195 | 30 |
| T519 | 1642025 | 76.90% | 15779 | 0.70% | 1626246 | 65531331 | 15103469 | 50427862 | 321382 | 50106480 | 31 |
| N521 | 1100878 | 81.50% | 5132 | 0.40% | 1095746 | 40933488 | 7579880 | 33353608 | 101379 | 33252229 | 30 |
| T521 | 2763589 | 74.70% | 8377 | 0.20% | 2755212 | 111677602 | 28112874 | 83564728 | 203215 | 83361513 | 30 |
| N561 | 3148830 | 75.30% | 14524 | 0.30% | 3134306 | 129387072 | 31789716 | 97597356 | 288898 | 97308458 | 31 |
| T561 | 2018680 | 77.80% | 20700 | 0.80% | 1997980 | 77376769 | 17196866 | 60179903 | 398387 | 59781516 | 30 |
| N586 | 841374 | 78.80% | 10734 | 1.00% | 830640 | 32011221 | 6862937 | 25148284 | 237544 | 24910740 | 30 |
| T586 | 1079086 | 73.10% | 918 | 0.10% | 1078168 | 44051010 | 11793598 | 32257412 | 21942 | 32235470 | 30 |
